# Supplementary material for: Gαq and Phospholipase Cβ signaling regulate nociceptor sensitivity in Drosophila melanogaster larvae
Source: PubMed Central journal article supplement (PMC6151255; doi:10.7717/peerj.5632), 2018-09-20

## Microarray detection of mdIV transcripts

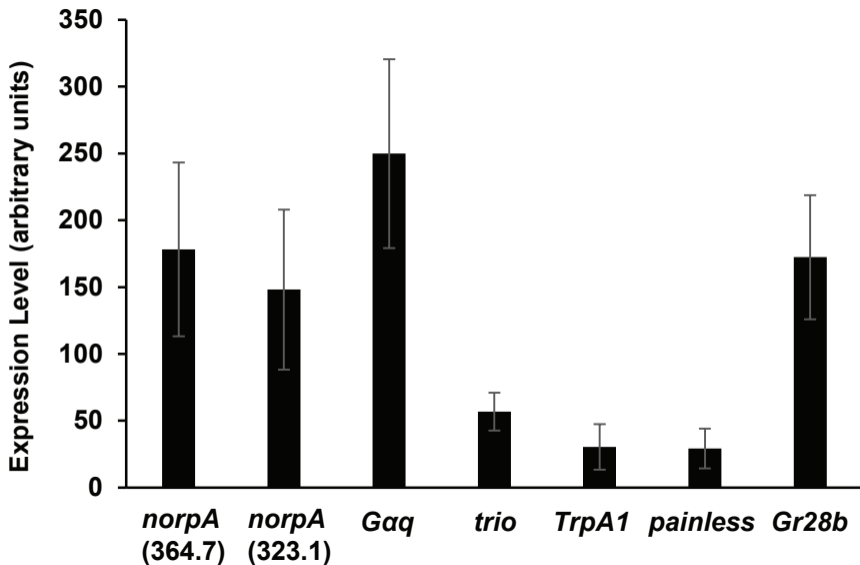

Supplement: peerj-06-5632-s001.pdf [file peerj-06-5632-s001.pdf]
