# Supplementary material for: Gαq and Phospholipase Cβ signaling regulate nociceptor sensitivity in Drosophila melanogaster larvae
Source: PeerJ. 2018 Sep 20;6:e5632. doi: 10.7717/peerj.5632 (PMC6151255; doi:10.7717/peerj.5632)
Supplement: Supplemental Information 1 — Thermal nociception data are shown as latency values in seconds for individual trials. Mechanical nociception data are shown as binary scores for individual trials (1 = NEL; 0 = No NEL). [file peerj-06-5632-s002.xlsx]

## Sheet: Figure 1a
	Individual	Start:	Stop:	Latency			Individual	Start:	Stop:	Latency								Thermal assay- 46 C	Individual	Start:	Stop:	Latency		Thermal assay- 46 C	Individual	Start:	Stop:	Latency		Thermal assay- 46 C	Individual	Start:	Stop:	Latency		Thermal assay- 46 C	Individual	Start:	Stop:	Latency
Cross: UAS-PARA-RNAi x PPK-GAL4; UAS-DICER 2	1	48.19	58.19	11		Cross: 36303 x PPK-GAL4; UAS-DICER 2	1	41.23	43.11	1.88		Cross: 36820 x PPK-GAL4; UAS-DICER 2	Individual	Start:	Stop:	Latency		Stock number:	1	47.5	57.5	11		Stock number:	1	13.08	14.02	0.94		Stock number:	1	37.29	40.18	2.89		Stock number:	1	59.29	61.06	1.77
Assay Date: 10/07/16, 10/10/16, 10/11/16	2	29.28	39.28	11		Assay Date: 10/07/16, 10/10/16	2	3.2	4.23	1.03		Assay Date: 10/07/16, 10/10/16	1	58.29	61.22	2.93		PPK-GAL4; UAS-DICER 2x Para	2	6.27	16.27	11		PPK-GAL4; UAS-DICER 2 x 36303	2	20.09	21.1	1.01		PPK-GAL4; UAS-DICER 2 x 36775	2	50.06	52.11	2.05		PPK-GAL4; UAS-DICER 2 x 33765	2	4.1	5.19	1.09
Cross Date: 9/29	3	47.08	57.08	11		Cross Date: 9/29	3	20.2	22.02	1.82		Cross Date: 9/29	2	41.22	48.01	6.79		Set up date:	3	25.15	35.15	11		Set up date:	3	32.1	33.18	1.08		Set up date:	3	27.17	28.28	1.11		Set up date:	3	10.07	11.17	1.1
	4	22.01	32.01	11			4	36.18	38.08	1.9			3	34.14	35.23	1.09		2017-06-21	4	46.05	56.05	11		2017-06-21	4	45.15	47.26	2.11		2017-06-21	4	54	55.26	1.26		2017-06-21	4	15	18.11	3.11
	5	15.17	25.17	11			5	0.03	1.06	1.03			4	15.22	17.21	1.99		Date flipped:	5	3.19	11.23	8.04		Date flipped:	5	56.23	60.18	3.95		Date flipped:	5	57.24	63.05	5.81		Date flipped:	5	57.07	59.26	2.19
	6	52.06	57.07	5.01			6	19.07	22.24	3.17			5	9.18	10.26	1.08			6	14.15	24.15	11			6	48.09	49.24	1.15			6	33.14	34.21	1.07		2017-10-19	6	5.2	7.2	2
	7	25.12	35.12	11			7	38.05	39.23	1.18			6	43.28	46.23	2.95		Date tested:	7	30.27	40.27	11		Date tested:	7	56.2	58.16	1.96		Date tested:	7	37.07	41.23	4.16		Date tested:	7	21.06	22.23	1.17
	8	1.21	11.21	11			8	59.26	60.26	1			7	10.09	11.27	1.18		06/26/2017, 06/27/2017	8	45.11	55.11	11		06/26/2017, 06/27/2017	8	5.01	6.14	1.13		06/26/2017, 06/27/2017	8	51.28	53.26	1.98		06/26/2017, 06/27/2017	8	39.19	41.03	1.84
	9	48.07	58.07	11			9	35.08	36.27	1.19			8	52.27	54.13	1.86			9	3.09	9.01	5.92			9	13.17	15.25	2.08			9	56.25	60.07	3.82			9	43.12	44.19	1.07
	10	9.09	19.09	11			10	5.07	6.12	1.05			9	35.22	39.12	3.9			10	56.05	66.05	11			10	28.28	31.04	2.76			10	8.27	11.13	2.86			10	49.2	52.16	2.96
	11	38.19	42.01	3.82			11	21.02	24.18	3.16			10	26.06	28	1.94			11	24.08	34.08	11			11	42.18	43.24	1.06			11	18.28	20.04	1.76			11	28.14	29.19	1.05
	12	3.09	13.09	11			12	47.28	48.26	0.98			11	52.2	53.24	1.04			12	43.22	53.22	11			12	56.01	59.05	3.04			12	27.06	29.03	1.97			12	33.15	35.12	1.97
	13	46.08	52.27	6.19			13	17.1	19.15	2.05			12	15.22	19.03	3.81			13	6.13	16.13	11			13	13.24	14.28	1.04			13	37.15	38.23	1.08			13	43	44.15	1.15
	14	24.22	35.07	10.85			14	42.15	44.09	1.94			13	43.12	53.12	11			14	31.22	41.22	11			14	22.02	23.02	1			14	23.22	27.02	3.8			14	54.02	56	1.98
	15	41.2	51.2	11			15	1.25	3.25	2			14	44.02	48.01	3.99			15	45.1	55.1	11			15	13.2	16.29	3.09			15	38.13	40.22	2.09			15	6.05	7.08	1.03
	16	46.24	53.15	6.91			16	21.03	22.11	1.08			15	7.06	11.12	4.06			16	4.29	10.02	5.73			16	23.17	25.27	2.1			16	43.13	44.16	1.03			16	10.27	12.02	1.75
	17	27.23	30.27	3.04			17	50.23	52.02	1.79			16	39.19	42	2.81			17	23.27	33.27	11			17	33.02	34.21	1.19			17	53.05	55.11	2.06			17	15.13	17.12	1.99
	18	42.02	52.02	11			18	11.09	12.09	1			17	1.07	3.11	2.04			18	55.29	62	6.71			18	42.02	43.29	1.27			18	60.26	62.06	1.8			18	53.11	54.16	1.05
	19	15.28	25.28	11			19	3.18	5.16	1.98			18	22.19	25.24	3.05			19	20.12	30.12	11			19	56.16	58.05	1.89			19	55.26	57.01	1.75			19	57.28	59.19	1.91
	20	44.28	53.21	8.93			20	26.07	27.27	1.2			19	8.09	15.29	7.2			20	36.11	46.11	11			20	11.13	13.04	1.91			20	2.06	3.22	1.16			20	8.09	10.13	2.04
	21	15.2	20.16	4.96			21	53.05	54.15	1.1			20	36.24	44.22	7.98			21	49.16	59.16	11			21	21.06	22.29	1.23			21	12.07	14.28	2.21			21	14	15.05	1.05
	22	53.08	61.28	8.2			22	12.28	13.25	0.97			21	1.01	3.16	2.15			22	22.16	30.22	8.06			22	31.28	33.22	1.94			22	16.16	18	1.84			22	18.07	19.22	1.15
Start of those assayed on 10/10	23	27.29	37.29	11			23	55.1	56.14	1.04			22	32.04	34.03	1.99			23	31.21	37.12	5.91			23	42.08	43.14	1.06			23	19.2	22.5	3.3			23	27.14	30.28	3.14
	24	54.18	64.18	11			24	14.16	15.18	1.02		Start of those assayed on 10/10	23	41.23	42.27	1.04			24	37.12	45	7.88			24	52.19	54.03	1.84			24	40.2	42.21	2.01			24	43.08	43.92	0.84
	25	33.16	43.16	11			25	31.09	32.18	1.09			24	32.24	40.25	8.01			tested 6/27/2017						25	9.07	12.17	3.1			tested 6/27						25	49.15	51.02	1.87
	26	59.17	61.28	2.11			26	48.28	49.19	0.91			25	43.01	45.15	2.14			25	22.06	32.06	11			26	22.13	24.13	2			25	39.17	40.15	0.98			26	6.1	7.13	1.03
	27	14.11	24.11	11			27	0.09	3.11	3.02			26	5.16	7.25	2.09			26	38.01	48.01	11			27	41.11	42.23	1.12			26	47.2	52.12	4.92			Tested6/27
	28	43.06	53.06	11			28	17.24	18.27	1.03			27	34.01	35.15	1.14			27	55	65	11			28	51.29	53.05	1.76			27	4.24	5.27	1.03			27	5.11	7.15	2.04
	29	56.04	57.25	1.21			29	34.1	37	2.9			28	31.02	33.09	2.07			28	18.03	28.03	11			29	55.01	56.1	1.09			28	15.21	17.19	1.98			28	15.2	18.03	2.83
	30	59.2	69.2	11			30	46.23	48.01	1.78			29	56.28	58.01	1.73			29	39.1	47.09	7.99			Tested 6/27						29	31.23	33.19	1.96			29	26.02	33.4	7.38
	31	45.23	47.13	1.9			31	51.15	52.18	1.03			30	10	15.26	5.26			30	57.1	67.1	11			30	41.25	43.18	1.93			30	39.17	41	1.83			30	44.17	45.11	0.94
	32	41	51	11		Start of those assayed on 10/10	32	8.29	10.06	1.77			31	37.13	47.13	11			31	21.22	31.22	11			31	0.02	1.02	1			31	54.24	57.26	3.02			31	53.26	54.23	0.97
	33	10.07	17.2	7.13			33	24.12	25.17	1.05			32	15.02	17.11	2.09			32	36	46	11			32	9.06	10.05	0.99			32	34.21	35.26	1.05			32	1.02	4.01	2.99
	34	35.21	45.21	11			34	40.02	43.16	3.14			33	34.08	38	3.92			33	50.07	60.07	11			33	8.25	10.17	1.92			33	44.02	45.23	1.21			33	15	17.04	2.04
	35	10.17	14.01	3.84			35	55.14	57	1.86			34	56.18	58.1	1.92			34	2.28	12.28	11			34	15.23	16.27	1.04			34	40.07	43.16	3.09			34	16.03	17.19	1.16
	36	38.11	48.11	11			36	24.04	25.14	11			35	17.24	19.17	1.93			35	19.12	29.12	11			35	24.07	25.18	1.11			35	10.25	12.1	1.85			35	24.11	25.08	0.97
	37	53.15	59.07	5.92			37	36.28	37.21	0.93			36	35.29	37.04	1.75			36	35.28	45.28	11			36	45.1	46.02	0.92			36	21.17	23.24	2.07			36	37.05	39.03	1.98
	38	27.1	36.15	9.05			38	43.04	44.9	1.86			37	14.02	15.04	1.02			37	52.19	62.19	11			37	54.22	55.23	1.01			37	34.01	35.09	1.08			37	49.17	52	2.83
	39	38.28	45.15	6.87			39	3.25	4.29	1.04			38	34.23	36.09	1.86			38	13.15	22.17	9.02			38	3.11	4.28	1.17			38	44.05	47.1	3.05			38	6.07	10.03	3.96
Assayed on 10/11	40	30.22	40.22	11			40	24.29	26.29	2			39	49.27	50.24	0.97			39	24.2	34.2	11			39	13.04	14.08	1.04			39	34.08	35.19	1.11			39	20.11	21.22	1.11
	41	4.21	14.21	11			41	37.13	38.13	1			40	5.08	6.07	0.99			40	36.26	46.26	11			40	21.2	22.6	1.4			40	38.16	41.04	2.88			40	24.16	25.29	1.13
	42	38.01	48.01	11			42	5.01	6.18	1.17			41	25.05	26.16	1.11									41	28.15	29.26	1.11									41	50.12	51.08	0.96
	43	12.21	22.21	11			43	22.14	23.13	0.99			42	2.15	4.02	1.87						10.1565			42	36.16	39.15	2.99						2.1995			42	53.18	59.12	5.94
	44	36.12	46.12	11			44	37.01	39.17	2.16			43	23.17	29.26	6.09									43	44.09	46.29	2.2
	45	2.1	12.03	9.93			45	8.24	10.28	2.04		Start of those assayed on 10/11	44	33.05	35.18	2.13									44	49.18	51.08	1.9												1.965
	46	30.03	40.03	11			46	40.11	43.1	2.99			45	48	49.05	1.05
	47	7.09	14.13	7.04			47	6.27	10.09	3.82			46	3.12	5.21	2.09
	48	1.22	10.08	8.86			48	37.17	40.29	3.12			47	24.02	26.26	2.24						Average						1.65068
							49	52.14	53.21	1.07			48	47.07	48.08	1.01					Genotype	Latency
													49	31.18	34.28	3.1					PARA	9.3815
													50	44.26	47.29	3.03					Gaq RNAi (36775)	2.1995
																					Gaq RNAi (33765)	1.965
																					RNAi Control	1.65068
				Average
			Genotype	Latency (sec)
			PARA	8.95354
			Gaq RNAi (36820)	1.86388
			RNAi Control	3.0296

## Sheet: Figure 1b
	Individual	Latency			Individual	Latency			Individual	Latency			Individual	Latency			Individual	Latency			Individual	Latency
Cross: w1118 x 36280	1	1.7		Cross: ppk-gal4; uas-dicer2 x 36280	1	6.6		Cross: w1118 x 36775	1	2.9		Cross: ppk-gal4; uas-dicer2 x 36775	1	4.8		Cross: w1118 x 33765	1	1.8		Cross: ppk-gal4; uas-dicer2 x 33765	1	11
Assay Date: 6/28,6/29	2	3.4		Assay Date: 6/28,6/29	2	8.3		Assay Date: 6/28,6/29	2	1.1		Assay Date: 6/28,6/29	2	2.3		Assay Date: 6/28,6/29	2	3.6		Assay Date: 6/28,6/29	2	2.1
Cross Date: 6/20	3	5.8		Cross Date: 6/20	3	11		Cross Date: 6/20	3	1.3		Cross Date: 6/20	3	6.5		Cross Date: 6/20	3	4.8		Cross Date: 6/20	3	3.9
	4	2.7			4	3.3			4	1.9			4	2.2			4	1.7			4	2.4
	5	1.4			5	3			5	1.9			5	3.8			5	2.1			5	3.4
	6	1.2			6	1.3			6	1.8			6	0.9			6	3.6			6	1.7
	7	1.1			7	2.1			7	1.7			7	2.3			7	5.4			7	2.2
	8	3.4			8	11			8	3.2			8	1.2			8	3.4			8	1.5
	9	2.3			9	2.5			9	2.2			9	1.8			9	1.5			9	1.9
	10	2.2			10	1.5			10	1.1			10	1.1			10	2.2			10	2
	11	1.1			11	3.3			11	2.5			11	2.3			11	3.4			11	2.1
	12	2			12	4.4			12	1.4			12	1.7			12	1.7			12	1.2
	13	1.1			13	6.5			13	1.7			13	1.3			13	1.6			13	1.7
	14	1.3			14	1.7			14	3.4			14	1.2			14	1.2			14	1.5
	15	2.6			15	3.7			15	1.5			15	1.2			15	1.3			15	2.9
	16	1.1			16	1.3			16	1.4			16	1.6			16	2.7			16	2.7
	17	2.3			17	5			17	1.4			17	2.8			17	3.8			17	5.1
	18	1.4			18	1			18	1.5			18	3.6			18	1.6			18	1.4
	19	1.5			19	2.3			19	1.2			19	3			19	1.8			19	2.5
	20	2.2			20	1.7			20	1.2			20	2.6			20	1.8			20	2.6
	21	3.4			21	2.9			21	3			21	1.4			21	1.8			21	2.9
	22	1.4			22	11			22	1.3			22	1.6			22	1.9			22	1.9
	23	1.4			23	3.8			23	1.1			23	0.9			23	2.1			23	1.2
	24	1.9			24	3.2			24	2.4			24	1.2			24	1.3			24	2.1
	25	1.7			25	2			25	2.3			25	8.6			25	3.7			25	7.5
	26	1.7			26	4.4			26	4.6			26	7.8			26	1.2			26	6.2
	27	2.1			27	1.6			27	1.2			27	4.1			27	1.2			27	2.4
	28	3			28	3.7			28	2.2			28	1.8			28	2.9			28	2.4
	29	1.1			29	5.4			29	2.7			29	1.6			29	6.2			29	2.4
	30	1.9			30	6			30	1.3			30	4.3			30	1.4			30	4.3
	31	3			31	4.2			31	1.4			31	1.7			31	1.3			31	2.4
	32	2.6			32	1.3			32	0.9			32	1.6			32	4.2			32	3.2
	33	1.9			33	3.4			33	1.4			33	3			33	2.5			33	1.3
	34	1.2			34	4.5			34	1.8			34	2			34	2.7			34	4.1
	35	1.2			35	2.6			35	1.9			35	4			35	1.7			35	3.8
	36	3			36	2			36	1.1			36	2			36	2.7			36	2
	37	2.2			37	2.6			37	1.3			37	1.1			37	6.8			37	1.8
	38	4.7			38	8.1			38	2.2			38	1.2			38	3.5			38	4.5
	39	2.5			39	3.4			39	2.6			39	3.4			39	3			39	3.4
	40	1.3			40	1.7			40	1.8			40	1.7			40	3.1			40	1.6
	41	2.7			41	6.6			41	1.4			41	1.2			41	2.7			41	4.4
	42	5			42	2.6			42	1.3			42	2.1			42	1.8			42	3
	43	2.4			43	5.9			43	1.2			43	1.1			43	1.6			43	1.5
	44	1.3			44	3			44	1.5			44	1.4			44	2.1			44
	45	4			45	2.6			45	1.4			45	2.3			45	1.4			45
	46	2.6			46	5.7			46	1.2			46	2.3			46	4.4			46
	47	1.4			47	5.8			47	1.9			47	1.4			47	4.7			47
	48	1.5			48				48	1.8			48	2.1			48	2.1			48
	49	2.6			49				49	1			49	2.7			49	2
	50	3.6							50				50	1.7			50	2.6			average	2.93256
	51	3.9											51	2.8			51	1.4
																	52	1.7
	average	2.27451			average	4.07447			average	1.78571			average	2.43725			53	1.1
																	54	1.9
																	55	1.1
																	56	4
																	average	2.55

## Sheet: Figure 1c
Mechanical assay-10 mm	Organism	1st	2nd	3rd			Mechanical assay-10 mm	Organism	1st	2nd	3rd			Mechanical assay-10 mm	Organism	1st	2nd	3rd			Mechanical assay-10 mm	Organism	1st	2nd	3rd		Mechanical assay-10 mm	Organism	1st	2nd	3rd		Mechanical assay-10 mm	Organism	1st	2nd	3rd		Mechanical assay-10 mm	Organism	1st	2nd	3rd
Stock number:	1	0	0	0			Stock number:	1	1	1	1			Stock number:	1	1	1	0			Stock number:	1	0	0	0		Stock number:	1	1	1	1		Stock number:	1	0	0	0		Stock number:	1	0	0	0
PARA RNAi x PPK-GAL4; UAS-DICER 2	2	0	0	0			36303 x PPK-GAL4; UAS-DICER 2	2	0	0	0			36820 x PPK-GAL4; UAS-DICER 2	2	1	1	1			PARA RNAi x PPK-GAL4; UAS-DICER 2	2	0	0	0		36303 x PPK-GAL4; UAS-DICER 2	2	1	1	1		36775 x PPK-GAL4; UAS-DICER 2	2	0	0	0		33765 x PPK-GAL4; UAS-DICER 2	2	0	0	1
Set up date:	3	1	1	1			Set up date:	3	0	0	0			Set up date:	3	1	1	1			Set up date:	3	0	0	0		Set up date:	3	1	1	1		Set up date:	3	1	1	1		Set up date:	3	0	0	0
2015-11-10	4	0	0	0			2015-11-10	4	1	1	1			2015-11-10	4	0	0	0			2017-09-04	4	0	0	0		2017-09-04	4	0	0	0		2017-09-04	4	1	1	1		2017-09-04	4	1	1	1
Date flipped:	5	1	0	0			Date flipped:	5	1	1	1			Date flipped:	5	1	1	1			Date flipped:	5	0	0	0		Date flipped:	5	1	1	1		Date flipped:	5	1	1	1		Date flipped:	5	1	1	1
11/10/15,11/12/15,11/12/13	6	0	0	1			11/10/15,11/12/15,11/12/13	6	1	0	1			11/10/15,11/12/15,11/12/13	6	0	0	1			9/6,9/7,9/8	6	1	1	1		9/6,9/7,9/8	6	1	1	1		9/6,9/7,9/8	6	0	0	0		9/6,9/7,9/8	6	1	0	0
Date tested:	7	0	0	0			Date tested:	7	1	1	1			Date tested:	7	0	1	1			Date tested:	7	0	0	0		Date tested:	7	1	1	1		Date tested:	7	1	1	0		Date tested:	7	1	1	1
11/15/15,11/17/15,11/18/15	8	0	0	1			11/15/15,11/17/15,11/18/15	8	1	1	1			11/15/15,11/17/15,11/18/15	8	1	1	1			9/10,9/11,9/12	8	1	1	1		9/10,9/11,9/12	8	1	1	1		9/10,9/11,9/12	8	0	0	0		9/10,9/11,9/12	8	0	0	0
	9	0	0	0				9	1	1	1				9	0	0	0				9	0	0	0			9	0	0	0			9	1	1	1			9	1	1	1
	10	1	1	1				10	0	0	0				10	1	1	1				10	1	1	1			10	1	1	1			10	0	0	0			10	0	0	0
	11	0	0	0				11	1	1	1				11	0	0	0				11	0	0	0			11	0	0	0			11	0	0	0			11	1	1	1
	12	0	0	1				12	1	1	1				12	0	0	0				12	0	0	0			12	1	1	1			12	1	1	1			12	0	0	0
	13	0	0	0				13	0	0	0				13	0	0	0				13	0	0	0			13	1	1	1			13	0	0	1			13	0	0	0
	14	0	0	0				14	1	1	1				14	1	1	1				14	0	0	0			14	1	1	1			14	1	1	1			14	1	1	1
	15	1	1	1				15	0	0	0				15	1	1	1				15	0	0	0			15	1	1	1			15	1	1	1			15	0	0	0
	16	0	0	0				16	1	1	1				16	1	1	1				16	1	1	1			16	0	0	0			16	0	0	0			16	0	0	0
	17	0	0	0				17	1	1	1				17	0	0	0				17	0	0	0			17	1	1	1			17	1	1	1			17	1	1	1
	18	0	0	0				18	0	0	0				18	0	0	0				18	0	0	0			18	1	1	1			18	0	0	0			18	1	1	1
	19	1	1	1				19	1	1	1				19	0	0	0				19	1	1	1			19	1	1	1			19	0	0	0			19	1	1	1
	20	0	0	0				20	1	1	1				20	1	1	1				20	0	0	0			20	0	1	1			20	0	0	0			20	1	1	1
	Sheet 2							Sheet 2							Sheet 2							21	0	0	0			21	1	1	1			21	0	0	0			21	1	1	1
	21	0	0	0				21	1	1	1				21	1	0	0				22	0	0	0			22	1	1	0			22	1	1	1			22	0	0	0
	22	0	0	0				22	1	1	1				22	0	1	1				23	0	0	0			23	0	0	0			23	1	1	1			23	0	0	0
	23	0	0	0				23	1	1	1				23	0	0	0				24	1	1	1			24	1	1	1			24	1	1	1			24	0	0	0
	24	0	0	1				24	1	1	1				24	1	1	1				25	0	0	0			25	1	1	1			25	0	0	0			25	1	1	1
	25	0	1	1				25	1	1	0				25	0	0	0				26	0	0	0			26	0	0	0			26	0	0	0			26	1	1	1
	26	0	0	0				26	0	0	0				26	1	1	1				27	0	0	0			27	1	1	1			27	0	0	0			27	0	0	0
	27	1	1	1				27	1	1	1				27	1	1	1				28	0	0	0			28	1	1	1			28	1	1	1			28	0	0	0
	28	0	0	0				28	0	0	0				28	1	1	1				29	0	0	0			29	1	1	1			29	0	0	0			29	1	1	1
	29	0	0	0				29	1	0	0				29	1	1	1				30	0	0	0			30	0	0	0			30	0	0	0			30	1	1	1
	30	0	0	0				30	0	0	0				30	0	1	1				31	0	0	1			31	1	1	1			31	1	1	1			31	0	0	0
	31	1	1	1				31	1	1	1				31	1	1	1				32	0	0	0			32	1	1	1			32	0	0	0			32	0	0	0
	32	0	0	0				32	1	1	1				32	0	0	0				33	0	0	0			33	1	1	1			33	0	0	0			33	1	1	1
	33	0	0	1				33	1	1	1				33	0	0	0				34	0	0	0			34	0	0	0			34	0	0	0			34	0	0	1
	34	0	0	0				34	1	1	1				34	1	1	1				35	1	1	1			35	0	0	0			35	0	0	0			35	0	0	0
	35	0	0	0				35	1	1	1				35	0	0	0				36	0	0	0			36	1	1	1			36	1	1	1			36	1	1	1
	Sheet 3							Sheet 3							Sheet 3							37	0	0	0			37	0	0	0			37	0	0	0			37	1	1	1
	36	0	0	0				36	1	1	1				36	0	0	0				38	1	1	1			38	1	1	1			38	1	1	1			38	1	1	1
	37	1	1	1				37	0	0	0				37	1	1	1				39	0	0	0			39	1	1	1			39	0	0	0			39	1	1	1
	38	0	0	0				38	1	1	1				38	0	0	0				40	1	1	1			40	1	1	1			40	0	0	0			40	0	0	0
	39	0	0	0				39	1	1	1				39	1	1	1				41	1	1	1			41	1	1	1			41	1	1	1			41	0	0	0
	40	0	0	0				40	1	1	1				40	1	1	1				42	0	0	0			42	1	1	1			42	0	0	0			42	0	0	0
	41	0	0	0				41	1	1	1				41	0	1	1				43	0	0	0			43	1	1	1			43	1	1	1			43	1	1	1
	42	0	0	0				42	1	1	1				42	1	1	1				44	0	0	0			44	0	0	0			44	1	1	1			44	0	0	0
	43	1	1	1				43	1	1	1				43	0	0	0				45	0	0	0			45	1	1	1			45	0	0	1			45	1	1	1
	44	0	0	0				44	1	1	1				44	1	1	1				46	0	0	0			46	1	1	1			46	0	0	0			46	0	0	0
	45	1	1	1				45	0	1	1				45	0	1	1				47	0	0	0			47	1	1	1			47	0	0	0			47	0	0	0
	46	0	0	0				46	0	0	0				46	1	1	1				48	0	0	0			48	0	0	0			48	0	0	0			48	0	0	0
	47	0	0	0				47	1	1	1				47	1	1	1				49	0	0	0			49	1	1	1			49	1	1	1			49	0	0	1
	48	0	0	0				48	1	1	1				48	1	1	1				50	0	0	0			50	1	1	1			50	0	0	0			50	0	0	0
	49	1	1	1				49	0	0	0				49	1	1	0				Tested 9/11/17						Tested 9/11/17						Tested 9/11/17						Tested 9/11/17
	50	0	0	0				50	0	1	1				50	0	0	0				51	0	0	0			51	1	1	1			51	0	0	0			51	1	1	1
Second cross: 2/18															Cross 2: 2/18/17							52	0	0	0			52	1	1	1			52	0	0	1			52	1	1	1
	51	0	0	0				cross 2: 2/18/17							51	0	0	1				53	0	0	0			53	1	1	1			53	0	0	0			53	1	1	0
	52	0	0	0				51	1	1	1				52	0	0	0				54	0	0	0			54	1	1	1			54	1	1	1			54	0	0	0
	53	0	0	0				52	1	1	1				53	0	0	0				55	1	1	1			55	1	1	1			55	1	1	1			55	1	1	1
	54	0	0	0				53	0	0	0				54	1	1	1				56	0	0	0			56	0	0	0			56	1	0	0			56	0	0	0
	55	0	0	0				54	1	1	1				55	0	0	0				57	1	1	1			57	1	1	1			57	1	1	1			57	0	0	0
	56	1	1	0				55	0	0	0				56	0	0	0				58	0	0	0			58	0	1	1			58	0	0	0			58	0	0	0
	57	0	0	0				56	1	1	1				57	0	0	0				59	0	0	0			59	1	1	1			59	1	1	1			59	1	1	1
	58	0	0	0				57	1	1	1				58	1	1	1				60	0	0	0			60	1	1	1			60	0	0	0			60	1	1	1
	59	1	1	1				58	0	0	0				59	0	0	0				61	0	0	0			61	1	1	1			61	1	1	1			61	1	1	1
	60	0	0	0				59	0	1	0				60	1	1	1				62	0	0	0			62	0	0	0			62	0	0	0			62	0	0	0
	61	0	0	0				60	1	1	1				61	1	1	1				63	1	1	1			63	1	1	1			63	0	0	0			63	1	1	1
	62	0	0	0				61	1	0	1				62	0	0	0				64	0	0	0			64	0	0	0			64	1	1	1			64	0	0	0
	63	0	0	0				62	1	1	1				63	0	0	0				65	1	1	1			65	1	1	1			65	0	0	0			65	1	1	1
	64	0	0	0				63	0	0	0				64	1	1	1				66	0	0	0			66	1	1	1			66	0	0	0			66	1	1	1
	65	1	1	1				64	1	1	1				65	1	1	1				67	0	0	0			67	1	1	1			67	1	1	1			67	0	0	0
	66	0	0	0				65	1	1	1				66	0	0	0				68	1	1	1			68	1	1	0			68	1	1	1			68	1	1	1
	67	0	0	0				66	1	1	1				67	1	1	1				69	0	0	0			69	0	0	1			69	1	1	1			69	0	0	0
	68	0	0	0				67	0	0	0				68	1	1	1				70	0	0	0			70	1	1	1			70	1	1	1			70	0	0	0
	69	1	1	1				68	1	1	1				69	0	0	0				71	0	0	0			71	0	0	1			71	1	1	1			71	0	0	0
	70	0	0	0				69	1	1	1				70	1	1	1				72	1	1	1			72	1	1	0			72	0	0	0			72	1	1	1
	71	0	0	0				70	1	1	1				71	1	1	1				73	0	0	0			73	0	0	1			73	0	0	0			73	1	1	1
	72	0	0	1				71	1	1	1				72	1	1	1				74	0	0	0			74	1	1	1			74	0	0	0			74	0	0	0
	73	0	0	0				72	1	1	1				73	0	0	0				75	0	0	0			75	1	1	1			75	1	1	1			75	1	1	1
	74	0	0	0				73	1	1	1				74	1	1	1				76	0	0	0			76	1	1	1			76	1	1	1			76	0	0	0
	75	0	0	0				74	1	1	1				75	0	0	1				77	0	0	0			77	1	1	1			77	0	0	0			77	0	0	0
	76	1	1	1				75	1	1	1				76	1	1	1				78	0	0	0			78	1	1	1			78	0	0	0			78	1	1	1
	77	0	0	0				76	0	0	0				77	0	0	0				79	0	0	0			79	1	1	1			79	0	0	0			79	0	0	0
	78	1	1	1				77	0	0	0				78	0	0	0				80	1	1	1			80	1	1	1			80	1	1	1			80	0	0	0
	79	0	0	0				78	1	1	1				79	0	0	0				81	0	0	0			81	0	0	0			81	0	0	0			81	0	0	0
	80	0	0	0				79	0	0	0				80	1	1	1				82	0	0	0			82	1	1	1			82	0	0	0			82	0	0	1
	tested 6/5/17							80	1	1	1				tested 6/5/17							83	0	0	0			83	0	0	0			83	1	1	1			83	1	1	1
	81	0	0	0			Additional data	tested 6/5/17							81	0	0	0				84	0	1	0			84	1	1	1			84	0	0	1			84	0	0	0
	82	0	0	0			Set up: 5/31/17	81	1	1	1				82	0	1	1				85	0	0	0			85	1	1	1			85	0	0	0			85	1	1	1
	83	0	0	0			Tested: 6/5,6/6	82	0	0	0				83	1	1	1				86	0	0	0			86	1	1	1			86	1	1	1			86	0	0	0
	84	0	0	0				83	0	0	0				84	1	1	1				87	1	1	1			87	1	1	1			87	1	1	1			87	1	1	1
	85	0	0	0				84	1	1	1				85	0	0	0				88	0	0	0			88	1	1	1			88	1	1	1			88	0	0	0
	86	1	1	1				85	1	1	0				86	1	1	1				89	0	0	0			89	1	1	1			89	1	1	1			89	0	0	0
	87	0	0	0				86	1	1	1				87	1	1	1				90	0	0	0			90	0	0	0			90	0	0	0			90	1	1	1
	88	0	0	0				87	1	1	1				88	0	0	0				91	0	0	0			91	1	1	1			91	0	0	0			91	0	0	0
	89	0	0	0				88	1	1	1				89	1	1	1				92	1	1	1			92	1	1	1			92	0	0	0			92	1	1	1
	90	0	0	0				89	0	0	0				90	0	0	0				93	0	0	0			93	0	0	0			93	1	1	1			93	1	1	1
	91	0	0	0				90	1	1	1				91	1	1	1				94	0	0	0			94	1	1	1			94	0	0	0			94	0	1	0
	92	0	0	0				91	0	0	0				92	1	1	1				95	0	0	0			95	1	1	1			95	1	1	1			95	0	0	0
	93	0	0	0				92	1	1	1				93	1	1	1				96	0	0	0			96	1	1	1			96	0	0	0			96	0	0	0
	94	1	1	1				93	1	1	0				94	0	0	0				97	0	0	0			97	1	1	1			97	0	0	0			97	0	0	0
	95	0	0	0				94	1	1	1				95	0	1	1				98	0	0	0			98	0	0	0			98	0	0	0			98	0	0	0
	96	0	0	0				95	0	0	0				96	0	0	0				99	1	1	1			99	1	1	1			99	0	0	1			99	1	1	1
	Tested 6/6/17							96	1	1	1				97	1	1	1				100	0	0	0			100	1	1	1			100	0	0	0			100	1	1	1
	97	0	0	0				97	1	1	1				98	0	0	0				Tested 9/12/17						Tested 9/12/17						Tested 9/12/17						Tested 9/12/17
	98	0	0	0				98	0	1	1				Tested 6/6/17							101	0	0	0			101	1	1	1			101	1	1	1			101	0	0	0
	99	0	0	1				99	1	1	1				99	1	1	1				102	0	0	0			102	1	1	1			102	0	0	0			102	0	0	10
	100	1	1	1				100	1	1	1				100	1	1	1				103	1	1	1			103	1	1	1			103	1	1	0			103	0	0	0
	101	0	0	0				Tested 6/6/17							101	0	0	0				104	0	0	0			104	0	0	0			104	1	1	1			104	0	0	0
	102	0	0	0				101	1	1	1				102	0	0	0				105	0	0	0			105	1	1	1			105	0	0	0			105	1	1	1
	103	0	0	0				102	1	1	1				103	0	0	0				106	0	0	0			106	1	1	1			106	0	0	0			106	1	1	1
	104	1	1	1				103	1	1	1				104	0	0	0				107	0	0	0			107	0	0	0			107	1	1	1			107	0	0	0
	105	0	0	0				104	1	1	1				105	1	1	1				108	1	1	1			108	1	1	1			108	0	0	0			108	0	0	0
	106	0	0	0				105	1	1	1				106	1	1	1				109	0	0	0			109	1	1	1			109	1	1	1			109	0	0	0
	107	0	0	0				106	0	0	0				107	0	0	0				110	0	0	0			110	1	1	1			110	0	0	0			110	1	1	1
	108	0	0	0				107	1	1	1				108	1	1	1				111	0	0	0			111	0	0	0			111	0	0	0			111	1	1	1
	109	0	0	0				108	0	0	0				109	0	0	0				112	0	0	0			112	1	1	1			112	1	1	1			112	0	0	0
	110	0	0	0				109	1	1	1				110	0	0	0				113	0	0	0			113	0	0	0			113	1	1	1			113	1	1	1
	111	1	1	1				110	0	0	0				111	1	1	1				114	0	0	0			114	0	0	0			114	0	0	0			114	0	0	0
	112	0	0	0				111	1	1	1				112	0	0	0				115	1	1	1			115	1	1	1			115	1	1	1			115	0	0	0
	113	0	0	0				112	1	1	1				113	1	1	1				116	0	0	0			116	1	1	1			116	0	0	0			116	1	1	1
	114	0	0	0				113	1	1	1				114	1	1	1				117	0	0	0			117	1	1	1			117	1	1	1			117	1	1	0
	115	0	0	0				114	0	0	0				115	1	1	1				118	0	0	0			118	1	1	1			118	1	1	1			118	1	1	1
	116	1	1	1				115	1	1	1				116	0	0	0				119	0	0	0			119	0	0	0			119	0	0	0			119	0	0	0
	117	0	0	0				116	0	0	0				117	0	0	0				120	1	1	1			120	1	1	1			120	1	1	1			120	1	1	1
	118	0	0	0				117	1	1	1				118	1	1	1
	119	1	1	1				118	1	1	1				119	0	0	0				% response	0.2					% response	0.741667					% response	0.441667					% response	0.458333
	120	0	0	0				119	1	1	1				120	1	1	1				# resp	24					# resp	89					# resp	53					# resp	55
								120	1	1	1											# non	96					# non	31					# non	67					# non	65
	% resp	0.2													% resp	0.508333
	# resp	24						% resp	0.716667						# resp	61
	# non	96						# resp	86						# non	59							% response	SEP
								# non	34													RNAi Control	74.166	3.99584
Stock ID	% Response	SEP																				Gaq RNAi (36775)	44.1667	4.53319
RNAi Contol	71.6667	4.11355																				Gaq RNAi (33765)	45.8333	4.54848
Gaq RNAi (36820)	50.8333	4.56372																				PARA	20	3.65148
PARA RNAi	20	3.65148
	resp	66						% resp	0.633333
	non	54						resp	76
								non	44

## Sheet: Figure 1d
Mechanical assay-10 mm	Organism	1st	2nd	3rd			Mechanical assay-10 mm	Organism	1st	2nd	3rd		Mechanical assay-10 mm	Organism	1st	2nd	3rd			Mechanical assay-10 mm	Organism	1st	2nd	3rd			Mechanical assay-10 mm	Organism	1st	2nd	3rd			Mechanical assay-10 mm	Organism	1st	2nd	3rd
Stock number:	1	0	0	0			Stock number:	1	0	0	1		Stock number:	1	1					Stock number:	1	1					Stock number:	1	1					Stock number:	1	0	0	0
w1118 x 36280	2	1	0	0			ppk-gal4; uas-dicer2 x 36280	2	1	0	0		w1118 x 36775	2	1					ppk-gal4; uas-dicer2 x 36775	2	1					w1118 x 33765	2	0	1				ppk-gal4; uas-dicer2 x 33765	2	0	0	0
Set up date:	3	0	1	0			Set up date:	3	0	1			Set up date:	3	1					Set up date:	3	1					Set up date:	3	1					Set up date:	3	1
2018-06-20	4	1	0	0			2018-06-20	4	0	0	1		2018-06-20	4	1					2018-06-20	4	1					2018-06-20	4	0	0	0			2018-06-20	4	0	1
Date flipped:	5	1	0	0			Date flipped:	5	1	0	0		Date flipped:	5	1					Date flipped:	5	1					Date flipped:	5	1					Date flipped:	5	0	0	0
6/22, 6/23, 6/24	6	1	0	0			6/22, 6/23, 6/24	6	1	0	0			6	0	1					6	1						6	1						6	0	0	0
Date tested:	7	0	0	0			Date tested:	7	1	0	0		Date tested:	7	1					Date tested:	7	0	0	1			Date tested:	7	0	1				Date tested:	7	0	0	0
6/28, 6/29, 6/30	8	0	1	0			6/28, 6/29, 6/30	8	0	1	0		6/28, 6/29, 6/30	8	0	1				6/28, 6/29, 6/30	8	0	0	0			6/28, 6/29, 6/30	8	0	0	0			6/28, 6/29, 6/30	8	0	0	0
	9	1	0	0				9	0	1	0			9	1						9	1						9	1						9	0	0	0
	10	1	0	0				10	0	0	0			10	0	0	0				10	0	1					10	1						10	0	1
	11	1	0	0				11	1	0	0			11	1						11	1						11	0	1					11	0	1
	12	0	0	1				12	0	0	0			12	1						12	0	0	0				12	1						12	0	0	1
	13	1	0	0				13	1	0	0			13	1						13	1						13	0	0	0				13	0	0	1
	14	1	0	0				14	0	0	0			14	1						14	0	0	0				14	0	0	1				14	0	0	1
	15	0	1	0				15	1	0	0			15	1						15	1						15	0						15	0	0	0
	16	1	0	0				16	0	0	1			16	1						16	0	1					16	1						16	0	0	1
	17	1	0	0				17	1	0	0			17	0	0	0				17	0	0	0				17	1						17	1
	18	0	1	0				18	0	0	1			18	0	1					18	0	0	1				18	1						18	0	1
	19	1	0	0				19	0	1	0			19	0	0	0				19	0	0	0				19	1						19	1
	20	1	0	0				20	0	0	1			20	1						20	0	1					20	1						20	0	0	1
	21	1	0	0				21	1	0	0			21	1						21	1						21	0	1					21	1
	22	0	1	0				22	0	0	0			22	1						22	0	1					22	1						22	1
	23	1	0	0				23	0	1	0			23	1						23	1						23	0	0	0				23	0	0	1
	24	1	0	0				24	1	0	0			24	1						24	1						24	0	1					24	0	0	0
	25	1	0	0				25	1	0	0			25	1						25	1						25	1						25	0	0	0
	26	0	0	1				26	1	0	0			26	1						26	0	0	0				26	0	0	1				26	0	0	0
	27	0	0	0				27	1	0	0			27	1						27	0	0	0				27	0	1					27	1
	28	1	0	0				28	0	0	0			28	1						28	1						28	0	0	0				28	0	0	0
	29	1	0	0				29	0	0	0			29	1						29	1						29	0	0	1				29	1
	30	1	0	0				30	0	1	0			30	1						30	1						30	0	0	0				30	1
	31	0	1	0				31	0	1	0			31	1						31	1						31	0	0	0				31	0	1
	32	1	0	0				32	1	0	0			32	1						32	0	0	0				32	0	0	1				32	0	0	1
	33	1	0	0				33	1	0	0			33	0	1					33	1						33	0	0	0				33	1
	34	0	1	0				34	0	0	0			34	1						34	1						34	1						34	0	0	0
	35	1	0	0				35	0	0	1			35	1						35	1						35	1						35	1
	36	1	0	0				36	0	1	0			36	0	1					36	1						36	0	1					36	0	1
	37	1	0	0				37	1	0	0			37	0	1					37	1						37	1						37	1
	38	0	0	0				38	1	0	0			38	1						38	1						38	1						38	0	0	1
	39	0	1	0				39	1	0	0			39	1						39	0	1					39	1						39	0	1
	40	1	0	0				40	0	1	0			40	0	1					40	1						40	0	0	0				40	0	0	0
	41	1	0	0				41	0	1	0			41	1						41	1						41	0	0	0				41	0	1
	42	1	0	0				42	1	0	0			42	1						42	0	1					42	1						42	1
	43	1	0	0				43	0	0	1			43	1						43	0	0	1				43	1						43	1
	44	0	1	0				44	0	1	0			44	1						44	0	0	0				44	0	1					44	1
	45	1	0	0				45	1	0	0			45	1						45	0	0	0				45	1						45	0	0	0
	46	0	1	0				46	0	0	1			46	1						46	0	0	0				46	0	0	0				46	1
	47	1	0	0				47	1	0	0			47	1						47	1						47	0	0	1				47	0	1
	48	0	0	1				48	0	0	0			48	0	1					48	0	1					48	0	0	0				48	0	0	0
	49	1	0	0				49	0	1	0			49	1						49	1						49	1						49	0	0	0
	50	1	0	0				50	1	0	0			50	1						50	0	0	0				50	0	0	0				50	1
	51	1	0	0				51	0	1	0			51	1						51	0	0	0				51	0	0	0				51	0	0	0
	52	1	0	0				52	0	0	0			52	1						52	0	1					52	1						52	0	0	0
	53	0	1	0				53	0	0	1			53	1						53	0	0	0				53	1						53	0	1
	54	1	0	0				54	0	1	0			54	1						54	1						54	1						54	1
	55	1	0	0				55	0	1	0			55	1						55	0	0	0				55	1						55	1
	56	0	1	0				56	1	0	0			56	1						56	0	0	0				56	1						56	0	1
	57	1	0	0				57						57	0	1					57	1						57	1						57	1
	58	1	0	0				58						58	1						58	0	1					58	1						58	0	0	0
	59	1	0	0				59						59	0	1					59	0	0	0				59	0	1					59	1
	60	1	0	0				60						60	1						60	1						60	1						60	0	0	0
	61	1	0	0				61						61	1						61	0	0	0				61	0	1					61	1
	62	1	0	0				62						62	1						62	1						62	1						62	0	0	0
	63							63						63	1						63	0	1					63	1						63	1
														64	1						64	1						64	0	1					64	1
	% resp	0.693548						% resp	0.410714					65	1						65	0	0	0				65	1						65	0	0	0
	# resp	43						# resp	23					66	1						66	1						66	0	1					66	1
	# non	18						# non	33					67	1						67	1						67	1						67	0	0	0
														68	0	0	0				68	1						68	0	0	0				68	0	0	0
														69	0	0	0				69	1						69	1						69	0	1
														70	0	0	0				70	0	1					70	0	0	0				70	1
														71	1						71	0	1					71	1						71	0	0	1
														72	1						72	0	1					72	1						72	0	0	0
														73	0	1					73	1						73	1						73	0	0	1
														74	1						74	1						74	1						74	1
														75	0	0	0				75	1						75	1						75	0	0	1
														76	1						76	1						76	0	1					76	1
														77	0	0	0				77	1						77	0	0	0				77	1
														78	0	1					78	1						78	0	0	0				78	1
														79	0	1					79	1						79	0	0	1				79	1
														80	1						80	1						80	1						80	1
														81	1						81	1						81	0	0	0				81	0	0	0
														82	1						82	1						82	0	0	0				82	0	1
														83	1						83	1						83	1						83	0	0	1
														84	1						84	1						84	1						84	0	0	0
														85	1						85	1						85	1						85	0	0	0
														86	1						86	1						86	1						86	1
														87	1						87	0	1					87	1						87	0	1
														88	1						88	1						88	1						88	1
														89	0	1					89	1						89	1						89	0	1
														90	0	1					90	1						90	1						90	0	1
														91	0	0	0				91	1						91	0	1					91	1
														92	0	0	1				92	1						92	0	0	0				92	1
														93	1						93	1						93	0	0	0				93	0	0	0
														94	1						94	1						94	0	1					94	0	0	1
														95	1						95	1						95	1						95	0	1
														96	0	1					96	1						96	1						96	0	0	0
														97	1						97	0	1					97	1						97	1
														98	1						98	1						98	0	0	0				98	1
														99	1						99	1						99	1						99	1
														100	1						100	1						100	0	0	0				100	0	0	0
														% resp	74						% resp	63						% resp	54						% resp	38
														# resp	74						# resp	63						# resp	54						# resp	38
														# non	26						# non	37						# non	46						# non	62
