# Supplementary material for: Gαq and Phospholipase Cβ signaling regulate nociceptor sensitivity in Drosophila melanogaster larvae
Source: PeerJ. 2018 Sep 20;6:e5632. doi: 10.7717/peerj.5632 (PMC6151255; doi:10.7717/peerj.5632)
Supplement: Supplemental Information 2 — Thermal nociception data are shown as latency values in seconds for individual trials. Mechanical nociception data are shown as binary scores for individual trials (1 = NEL; 0 = No NEL). [file peerj-06-5632-s003.xlsx]

## Sheet: Figure 2a
	Thermal assay- 46 C	Individual	Start:	Stop:	Latency		Thermal assay- 46 C	Individual	Start:	Stop:	Latency		Thermal assay- 46 C	Individual	Start:	Stop:	Latency
	Stock number:	1	56.12	60.19	4.07		Stock number:	1	53.02	54.19	1.17		Stock number:	1	52.06	59.13	7.07
	PPK-GAL4 x W1118	2	7.18	9.1	1.92		PPK-GAL4 x 30734	2	1.11	4.24	3.13		W1118 x 30734	2	3.26	5	1.74
	Set up date:	3	19.03	22.27	3.24		Set up date:	3	9.2	10.24	1.04		Set up date:	3	8.23	10.15	1.92
	2017-11-15	4	39.21	44.11	4.9		2017-11-15	4	30.21	33.21	3		2017-11-15	4	13.08	16.26	3.18
	Date flipped:	5	56.09	58.03	1.94		Date flipped:	5	42.29	44.14	1.85		Date flipped:	5	33.17	35.14	1.97
	11/17/2017, 11/20/2017	6	14.12	18.11	3.99		11/17/2017, 11/20/2017	6	58.22	59.13	0.91		11/17/2017, 11/20/2017	6	41.2	43.27	2.07
	Date tested:	7	28.01	30.27	2.26		Date tested:	7	6.2	9.06	2.86		Date tested:	7	49.24	52.03	2.79
	11/22/2017,11/24/2017, 11/25/2017	8	41.11	42.26	1.15		11/22/2017,11/24/2017, 11/25/2017	8	3.08	9.21	6.13		11/22/2017,11/24/2017, 11/25/2017	8	35.15	37.27	2.12
		9	53.07	54.16	1.09			9	21.17	23.11	1.94			9	42.08	44.15	2.07
		10	11.16	12.21	1.05			10	33.24	35.14	1.9			10	52.17	54.19	2.02
		11	21.17	23.25	2.08			11	43.15	44.25	1.1			11	58.08	67.13	9.05
		12	33.23	35.03	1.8			12	55.02	56.06	1.04			12	14.07	17.12	3.05
		13	47.11	51.09	3.98			13	2.26	4.13	1.87			13	21.25	24.03	2.78
		14	10.06	12.18	2.12			14	9.18	11.23	2.05			14	32.02	33.26	1.24
		15	19.2	21.27	2.07			15	31.2	33.22	2.02			15	40.28	44.13	3.85
		16	34.17	42.12	7.95			16	52.29	54.04	1.75			16	52.05	55.03	2.98
		17	50.25	52.01	1.76			17	29.23	31.18	1.95			17	4.13	5.16	1.03
		18	41.16	42.25	1.09			18	40.24	42.15	1.91			18	17.17	19.01	1.84
		19	7.17	10	2.83			19	51.24	56.01	4.77			19	25.25	28.21	2.96
		20	19.26	22.27	3.01			20	5.09	11.1	6.01			20	36.16	38.08	1.92
		21	34.02	36.08	2.06			21	23.03	24.05	1.02			21	28.04	30.19	2.15
		22	51.03	52.27	1.24			22	43.08	46.28	3.2			22	40.09	42.01	1.92
		23	3.04	5.19	2.15			23	6.13	7.21	1.08			23	49.17	51.13	1.96
		24	15.06	17.08	2.02		Tested: 11/24/17							24	57	65.25	8.25
		25	29.03	31.16	2.13			24	32.25	34.11	1.86		Tested: 11/24/17
		26	47.21	49.14	1.93			25	38.21	40.1	1.89			25	36.19	37.26	1.07
		27	0.23	4.28	4.05			26	46.25	48.27	2.02			26	43.26	45.09	1.83
		28	19.28	21.29	2.01			27	55.18	56.1	0.92			27	50.25	53.29	3.04
		29	30.28	33.02	2.74			28	20.04	21.1	1.06			28	1.2	3.26	2.06
		30	37.11	39.07	1.96			29	11.14	12.14	1			29	12.21	15.07	2.86
	Tested: 11/24/17							30	21.13	23.02	1.89			30	1.29	4.26	2.97
		31	17.06	18.3	1.24			31	30.15	31.17	1.02			31	11.15	13.01	1.86
		32	22.15	25.16	3.01			32	40.16	41.17	1.01			32	20.08	21.28	1.2
		33	33	35.19	2.19			33	52.16	53.24	1.08			33	28.01	30.05	2.04
		34	44.26	46.14	1.88			34	1.15	3.11	1.96			34	37.2	41.15	3.95
		35	55.13	59.22	4.09			35	53.06	54.16	1.1			35	46.22	48.13	1.91
		36	7.14	10.09	2.95			36	58.21	60.16	1.95			36	45.29	48.02	2.73
		37	16.08	17.21	1.13			37	4.16	6.04	1.88			37	55.2	58.04	2.84
		38	14.28	16.12	1.84			38	14.27	16.01	1.74			38	11.07	15.26	4.19
		39	24.01	26.13	2.12			39	23.27	25.24	1.97			39	25.11	27.1	1.99
		40	37.1	38.29	1.19			40	32.29	34.04	1.75			40	50.08	53.02	2.94
		41	55.02	56.19	1.17			41	18.29	20.15	1.86			41	11.24	14.17	2.93
		42	5.13	8.09	2.96			42	22.02	24.13	2.11			42	41.16	42.24	1.08
		43	56.28	58.24	1.96		Tested: 11/25/17							43	46.13	47.16	1.03
		44	23.03	27.16	4.13			43	34.2	36.26	2.06		Tested: 11/25/17
		45	30.09	32.16	2.07			44	45.06	47.04	1.98			44	3.22	7.16	3.94
	Tested: 11/25/17							45	36.26	40.2	3.94			45	15.21	20.15	4.94
		46	41.14	43.18	2.04			46	51.01	52.18	1.17			46	28.23	31.29	3.06
		47	53.22	56.11	2.89			47	6.24	10.21	3.97			47	40.25	44.02	3.77
		48	8.17	10.12	1.95			48	21.12	25.13	4.01			48	54.02	55.08	1.06
		49	23.21	29.25	6.04			49	18.06	20.08	2.02			49	16.08	18.02	1.94
		50	50.22	52.25	2.03			50	28.28	30.03	1.75			50	27.07	28.26	1.19
		51	14.05	24.05	10			51	38.29	40.04	1.75			51	38.26	40.25	1.99
		52	12	13.17	1.17			52	4.26	7.23	2.97			52	40.28	41.17	0.89
		53	33.07	38.04	4.97			53	22.14	23.09	0.95			53	49.03	51.12	2.09
		54	12.16	16.17	4.01			54	33.23	37.16	3.93			54	8.2	14	5.8
		55	29.17	31.19	2.02			55	49.25	51.02	1.77			55	16.09	22.07	5.98
		56	54.09	56.14	2.05			56	53.13	58.29	5.16
		57	10.08	18.11	8.03
											2.16429						2.78364
					2.76702
			Genotype	Latency (s)
			ppk-GAL4 only	2.76702
			ppk-GAL4 UAS-Gaq	2.16429
			UAS-Gaq only	2.78364

## Sheet: Figure 2b
Mechanical assay-10 mm	Organism	1st	2nd	3rd	Mechanical assay-10 mm	Organism	1st	2nd	3rd		Mechanical assay-10 mm	Organism	1st	2nd	3rd
Stock number:	1	1	1	0	Stock number:	1	0	0	0		Stock number:	1	1	1	1
PPK GAL 4 (virgins) x W1118	2	1	1	1	PPK GAL4 (Virgins) x UAS GQ (30734)	2	1	1	1		W1118 (Virgins) x UAS GQ (30734)	2	0	0	0
Set up date:	3	1	1	1	Set up date:	3	1	1	0		Set up date:	3	1	1	1
2016-09-14	4	1	1	1	2016-09-14	4	1	1	1		2016-09-14	4	0	0	0
Date flipped:	5	1	1	0	Date flipped:	5	0	1	1		Date flipped:	5	1	1	1
9/16/16,9/16/16, 9/17/16	6	0	0	1	9/16/16,9/16/16,9/17/16	6	1	1	1		9/16/16,9/16/16,	6	1	1	1
Date tested:	7	0	0	1	Date tested:	7	1	1	1		Date tested:	7	0	0	0
9/20/16,9/21/16,	8	0	0	0	9/20/16,9/21/16,	8	1	1	1		9/20/16,9/21/16,	8	1	1	1
	9	1	1	1		9	1	1	1			9	0	0	0
	10	1	1	1		10	1	1	1			10	1	1	1
	11	0	0	0		11	1	1	1			11	1	1	1
	12	1	1	1		12	1	1	1			12	1	0	1
	13	0	1	1		13	0	1	0			13	1	1	0
	14	1	1	1		14	1	1	1			14	1	1	1
	15	1	1	0		15	1	1	1			15	0	0	0
	16	1	1	1		16	1	1	1			16	1	1	1
	17	1	1	1		17	1	1	1			17	0	0	0
	18	1	1	0		18	1	1	1			18	0	0	0
	19	0	1	1		19	1	1	1			19	1	1	0
	20	1	1	1		20	1	1	0			20	0	0	1
	21	1	1	1		21	1	1	1			21	1	1	1
	22	1	1	1		22	0	1	0			22	1	0	0
	23	0	0	0		23	1	1	1			23	1	1	1
	24	1	1	1		24	1	1	1			24	1	1	1
	25	1	1	1		25	1	1	1			25	0	1	0
	Sheet 2					Sheet 2						Sheet 2
	26	1	1	1		26	1	1	1			26	1	1	0
	27	0	1	0		27	1	1	1			27	1	1	1
	28	0	0	0		28	1	1	1			28	1	1	1
	29	1	1	1		29	1	1	1			29	0	1	1
	30	1	1	1		30	0	1	1			30	0	0	0
	31	1	1	1		31	1	1	1			31	1	1	1
	32	1	1	1		32	1	1	1			32	0	0	0
	33	1	1	1		33	1	1	1			33	0	0	1
	34	1	0	0		34	1	1	1			34	1	1	1
	35	0	0	0		35	0	1	1			35	1	1	1
	36	1	0	1		36	0	0	0			36	0	0	0
	37	1	1	1		37	1	1	1			37	1	1	1
	38	1	1	1		38	1	1	1			38	1	1	1
	39	1	1	1		39	1	1	1			39	1	1	1
	40	1	1	1		40	1	1	1			40	1	1	1
	41	0	0	0		41	1	1	1			41	1	1	1
	42	1	1	0		42	1	1	0			42	1	1	1
	43	0	1	1		43	1	1	1			43	1	1	1
	44	1	1	1		44	1	1	1			44	0	0	0
	45	1	0	0		45	1	1	1			45	1	1	1
	46	1	1	1		46	1	0	0			46	1	1	1
	47	1	1	1		47	1	1	1			47	1	0	1
	48	1	1	1		48	0	0	0			48	0	0	0
	49	0	0	0		49	1	1	1			49	0	0	0
	50	0	0	0		50	1	1	1			50	0	0	0
	Sheet 3					Sheet 3						Sheet 3
	51	1	1	1		51	1	1	1			51	1	1	1
	52	0	0	0		52	1	1	1			52	0	1	1
	53	1	1	1		53	1	1	1			53	0	1	0
	54	0	1	1		54	1	1	1			54	1	1	1
	55	0	0	0		55	1	1	1			55	1	1	0
	56	1	1	1		56	1	1	1			56	1	1	1
	57	1	1	1		57	1	1	1			57	1	1	1
	58	1	1	1		58	1	1	1			58	1	1	1
	59	1	1	1		59	1	1	1			59	1	1	1
	60	1	1	1		60	1	1	1			60	0	0	0
	61	1	1	1		61	1	0	1			61	0	0	0
	62	1	1	1		62	1	1	1			62	1	1	1
	63	0	1	1		63	1	1	1			63	0	1	1
	64	1	1	1		64	0	0	0			64	1	1	1
	65	1	1	1		65	1	1	1			65	1	1	1
	66	1	1	1		66	0	1	1			66	1	1	1
	67	0	0	0		67	1	1	1			67	1	1	1
	68	1	1	1		68	1	1	1			68	0	0	0
	69	0	0	0		69	0	0	0			69	1	1	1
						70	1	1	1			70	1	1	1
	Total organsims	69				71	1	1	1			71	1	1	1
	%response (1st column)	0.710145				72	0	1	1			72	1	1	1
	# resp	49				73	1	1	1			73	0	1	1
	# non	20				74	1	1	1			74	0	1	1
						75	1	1	1			75	1	1	1
						Total organsims	75					Total organsims	75
						%response (1st column)	0.84					%response (1st column)	0.653333
						# resp	63					# resp	49
						# non	12					# non	26
	Genotype	Percent response	SEP
	ppk-GAL4 only	71.0145	5.46185
	UAS-Gaq only	65.3333	5.49532
	ppk-GAL4 UAS-Gaq	84	4.2332
