# Supplementary material for: Gαq and Phospholipase Cβ signaling regulate nociceptor sensitivity in Drosophila melanogaster larvae
Source: PeerJ. 2018 Sep 20;6:e5632. doi: 10.7717/peerj.5632 (PMC6151255; doi:10.7717/peerj.5632)
Supplement: Supplemental Information 4 — Data total branch length and total branch number are shown for each neuron analyzed by genotype. [file peerj-06-5632-s005.xlsx]

## Sheet: 4D Count
		Total Branch #
	Wild type	668	420	567	611	366	424
	Gαq RNAi	363	532	398	505	490	510
	NorpA RNAi	370	568	433	479	426	403
		Mean	Std Dev	Std Error
	Wild type	509.333	122.183	49.881
	Gαq RNAi	466.333	68.733	28.06
	NorpA RNAi	446.5	69.521	28.382

## Sheet: 4E Length
		Total Branch Length
	Wild type	53321.5	40812.6	59138.3	59624.7	43801.8	43639.7
	Gαq RNAi	43226.2	53073.1	41525.6	51090.5	48209.2	51251.1
	NorpA RNAi	30702.4	48377.1	43525.5	43582.7	43411.7	41798.7
		Mean	Std Dev	Std Error
	Wild type	50056.4	8371.83	3471.78
	Gαq RNAi	48062.6	4702.86	4935.35
	NorpA RNAi	41899.7	5917.93	6210.49
